# Supplementary material for: Class solutions for SABR-VMAT for high-risk prostate cancer with and without elective nodal irradiation
Source: Springer Nature journal article supplement (doi:10.1186/s13014-016-0730-7), 2016-11-23

**(a) Prostate only**

**(b) Prostate and pelvic node**

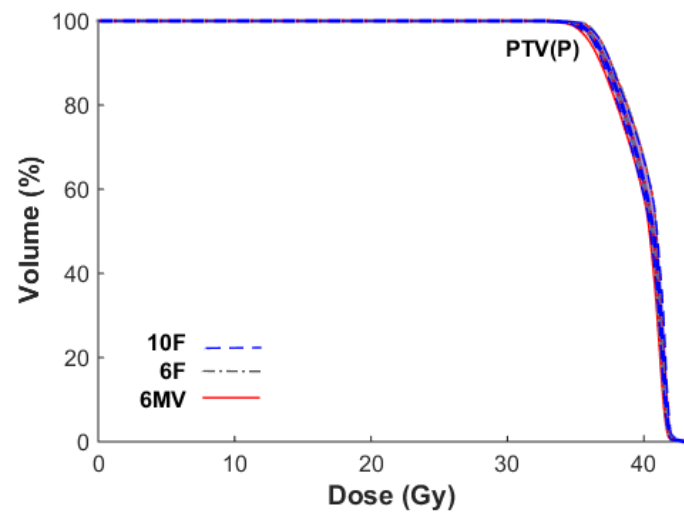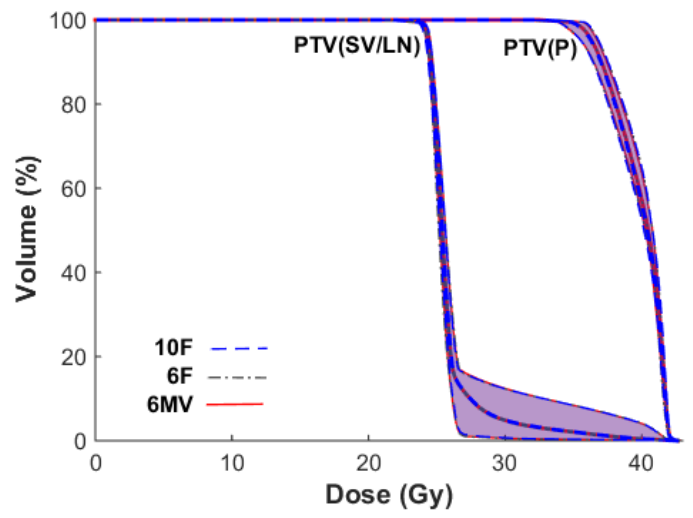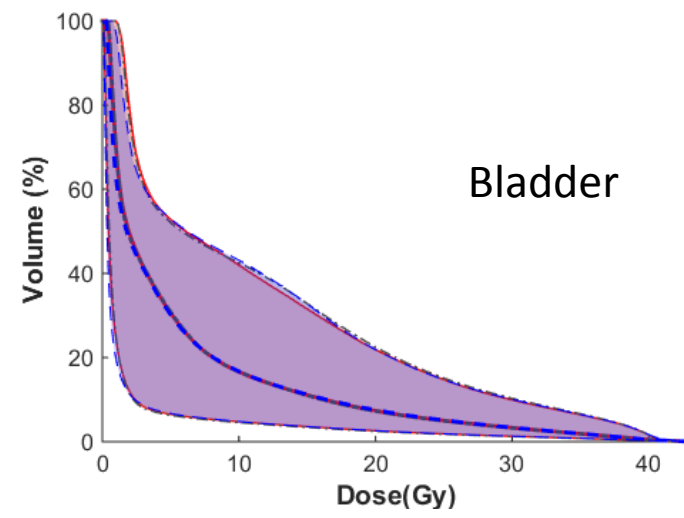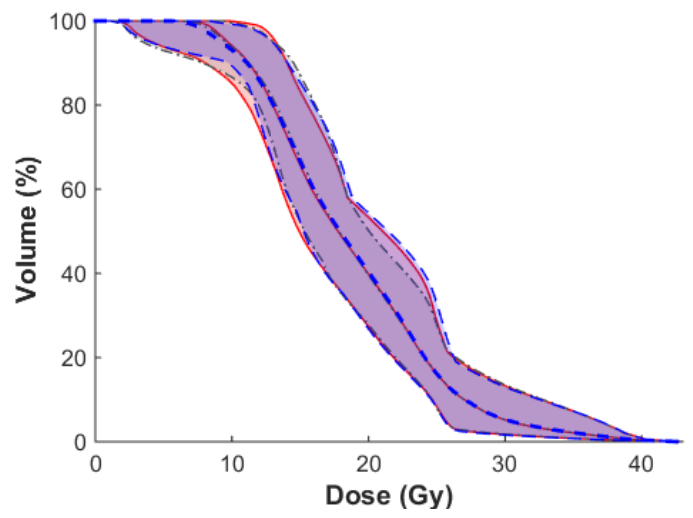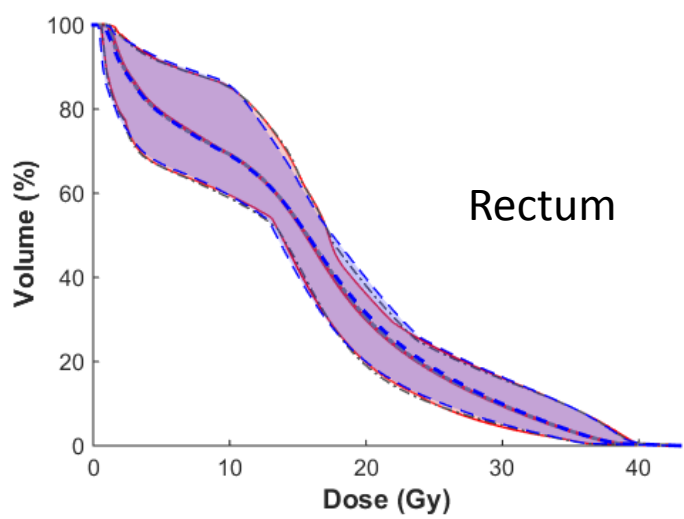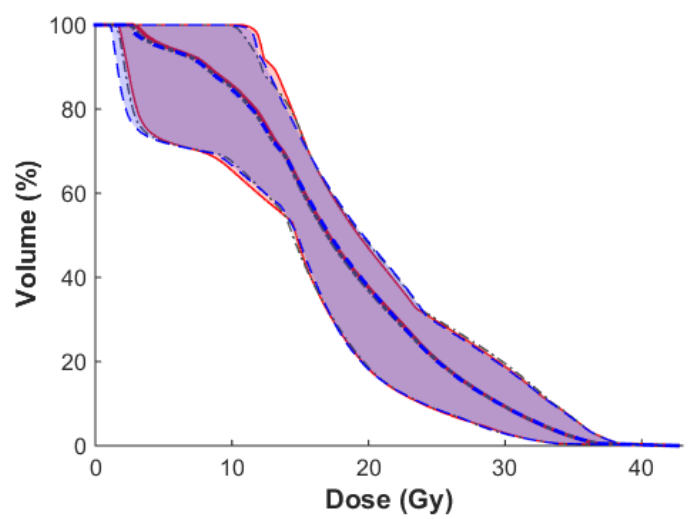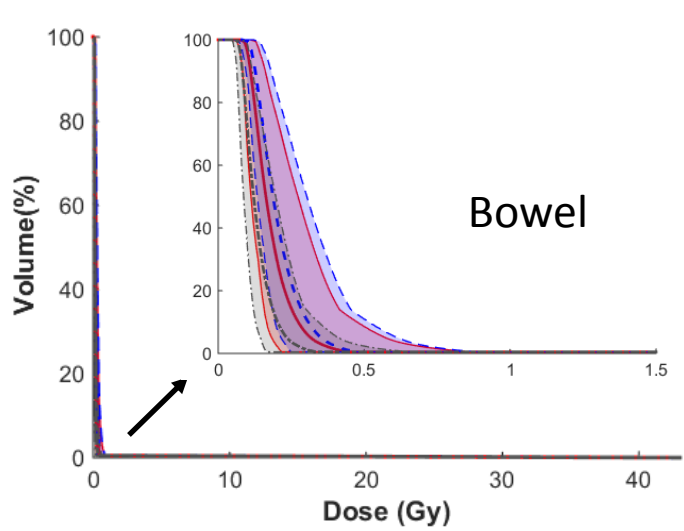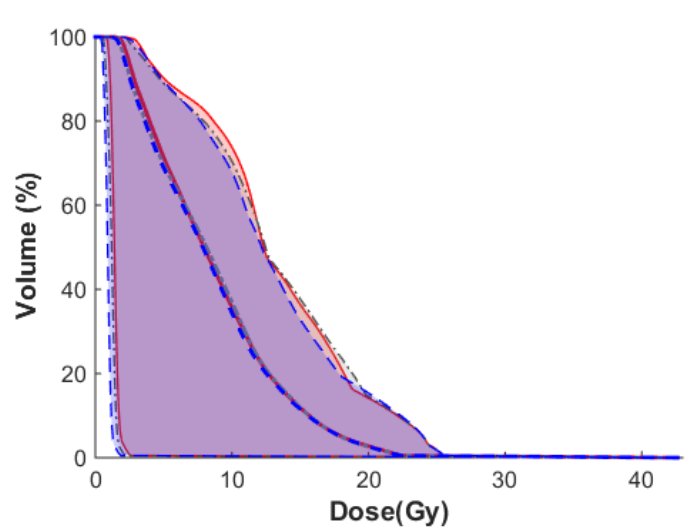

Supplement: MOESM2 [file 11091766]
